# Supplementary material for: Anion-modulated nickel-based nanoheterostructures as high performance electrocatalysts for hydrogen evolution reaction
Source: Royal Society of Chemistry journal article supplement (doi:10.1039/d0ta03513k), 2020-01-01
Supplement: d0ta03513k1.pdf [file d0ta03513k1.pdf]

## Electronic supplementary information

# Anion-modulated nickel-based nanoheterostructures as high performance electrocatalysts for hydrogen evolution reaction

Yang Li, Yugan Gao, Sen Yang, Chengqi Wu, and Yiwei Tan\*

*State Key Laboratory of Materials-Oriented Chemical Engineering, School of Chemistry and Chemical Engineering, Nanjing Tech University, Nanjing 211816, China, Email: [ytan@njtech.edu.cn](mailto:ytan@njtech.edu.cn)*

## Experimental section

### Materials

Selenic acid ( $\text{H}_2\text{SeO}_4$ , Alfa Aesar, 40% aqueous solution), nickel(II) acetylacetonate ( $\text{Ni}(\text{acac})_2$ , Alfa Aesar, 96%), n-octyl mercaptan (Alfa Aesar, 98%), 2-methoxy-5-nitroaniline (MNA, Alfa Aesar, > 98%), 1-octadecene (ODE, Alfa Aesar, 90%), oleylamine (OAm, Alfa Aesar, approximate C18-content 80-90%), tri-n-octylphosphine (TOP, Sigma-Aldrich, 90%), N-methyl-2-pyrrolidinone (NMPD, Alfa Aesar, 99%), nickel foam (1.5-mm thickness, Ailantian Advanced Technology Materials Co. Ltd.) were purchased from various commercial sources and used without any further purification if not otherwise specified. Ultrapure water (18.2 M $\Omega$ ) produced with a Milli-Q purification system was used in the synthesis and electrochemical measurements.

### Electrode preparation

For the preparation of Pt/C working electrode as a reference, 2 mg of Pt/C (20 wt% Pt) and 40  $\mu\text{L}$  of Nafion solution (5 wt%) were dispensed in 460 mL of water/ethanol (v/v = 4 : 1) and then sonicated for 30 min to form a homogenous ink dispersion. Afterward, 200  $\mu\text{L}$  of the dispersion was drop-casted on a piece of Ni foam with an exposure area of 0.5  $\text{cm}^2$  to obtain a loading amount of 0.16  $\text{mg cm}^{-2}$  for the electroactive Pt.

### Characterization of materials

Scanning electron microscopy (SEM) images were acquired using a Hitachi S-4800 field-emission scanning electron microscope to investigate the morphology of the catalysts, operating at an acceleration voltage of 5 kV. Transmission electron microscopy (TEM) images were obtained using an FEI Tecnai G2 Spirit Bio TWIN transmission electron microscope operated at an accelerating voltage of 100 kV. High-resolution TEM (HRTEM) and scanning TEM (STEM) micrographs, and EDX elemental maps were acquired using an FEI Tecnai G2 F20 S-TWIN transmission electron microscope operated at 200 kV to probe the crystallographic structure and composition of samples. STEM micrographs and EDX elemental maps were obtained in high-angle annular dark field (HAADF) mode to provide the bulk chemical composition of samples. The specimens for TEM observations were scratched from the NF support and sonicated before dropping them onto 300 mesh carbon-coated copper or molybdenum grids. Atomic force microscopy (AFM) measurements were implemented by Veeco Dimension 3100 SPM system. To analyze the surface composition and elemental oxidation states of samples, X-ray photoelectron spectroscopy (XPS) measurements were carried out using a Kratos Axis Supra (Kratos Analytical, Japan) spectrometer at 15 kV and 10 mA with a hemispherical energy analyzer, employing a monochromated microfocussed ( $300 \times 700 \mu\text{m}^2$ ) Al-K $\alpha$  ( $h\nu = 1486.58 \text{ eV}$ ) X-ray source. Samples for XPS measurements were carefully scratched from the NF support and then sputtered by repeated cycles of  $\text{Ar}^+$  ions to obtain clean sample surfaces. The binding energies (BEs) of the core levels were calibrated by setting the adventitious C 1s peak at 284.8 eV. Survey spectra of the samples in the BE range of 0–1000 eV and the core level spectra of the elemental signals were collected with a step size of 1 and 0.1 eV, respectively. To obtain the phase and structure of samples, the X-ray diffraction (XRD) patterns were recorded using a Rigaku SmartLab diffractometer with a Cu K $\alpha$  X-ray source ( $\lambda = 1.5406 \text{ \AA}$ , generated at 40 kV and 100 mA) at a scanning rate of 0.06°  $\text{s}^{-1}$ , and scanned in the

Bragg–Brentano mode from  $2\theta$  of  $10^\circ$  to  $90^\circ$  in  $0.02^\circ$  increments. The active materials were carefully scratched from the NF support and then used as the specimen for XRD characterization after cleaning treatment. The chemical composition of the catalyst was determined by EDX quantitative analysis and inductively coupled plasma atomic emission spectrometry (ICP-AES, Prodigy, Leeman Labs Inc.,  $\lambda = 165\text{--}800\text{ nm}$ , As = 200 nm) measurements after dissolving the sample in aqua regia.

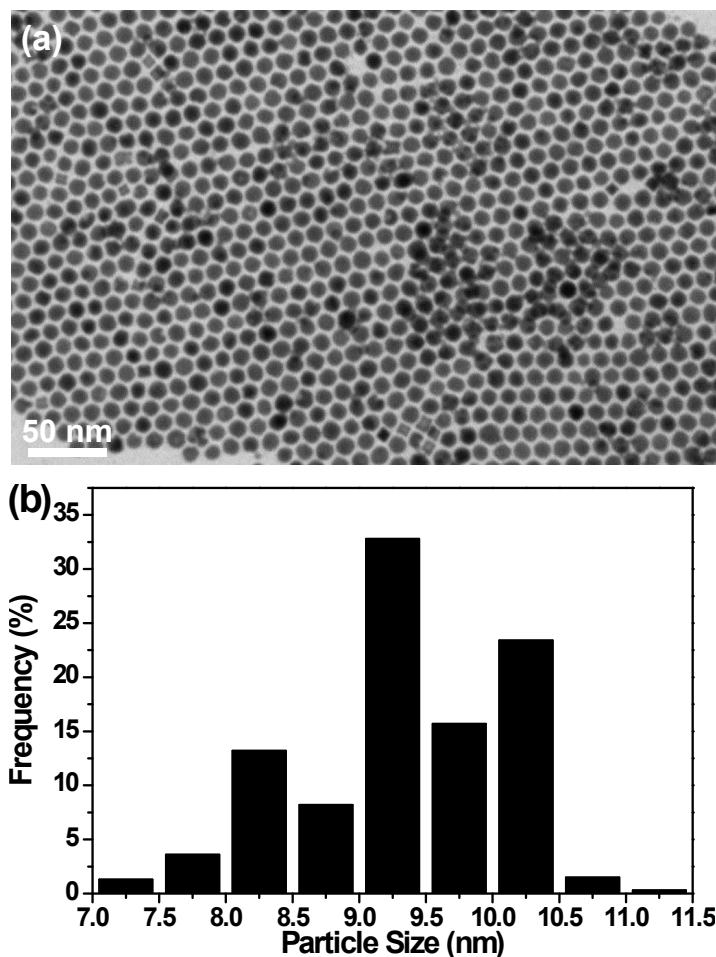

**Figure S1.** (a) TEM image and (b) the corresponding size distribution histogram of the as-prepared  $\text{Ni}_2\text{P}$  NPs.

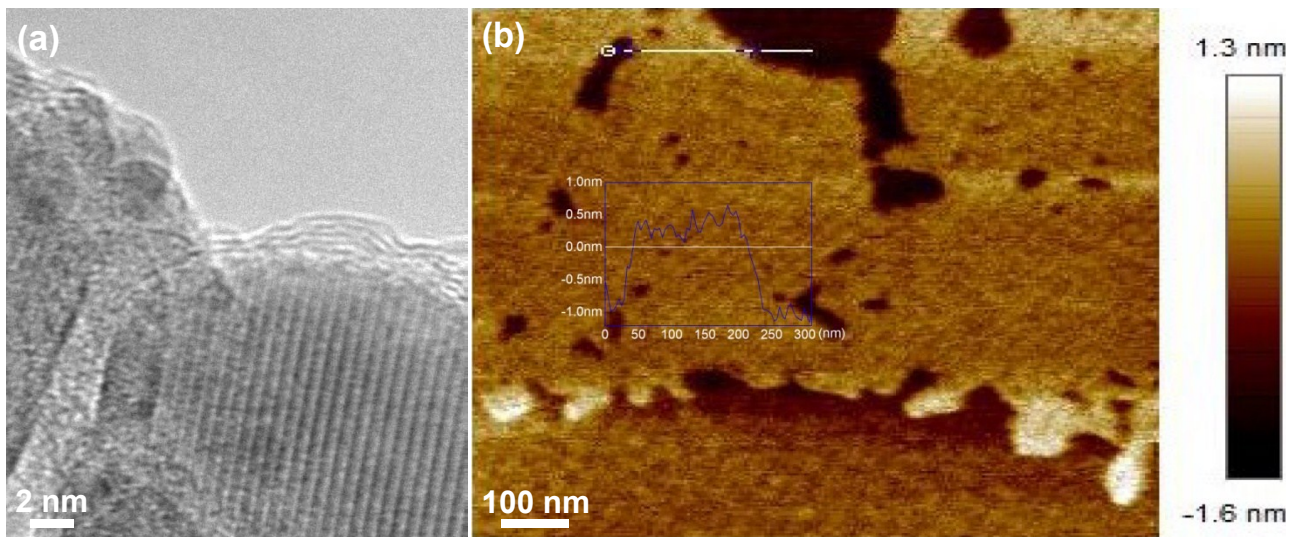

**Figure S2.** (a) HRTEM and (b) AFM images of  $\text{Ni}_3\text{Se}_4$  NSs. The inset in panel (b) showing the height profiles to demonstrate the thicknesses of  $\text{Ni}_3\text{Se}_4$  NSs.

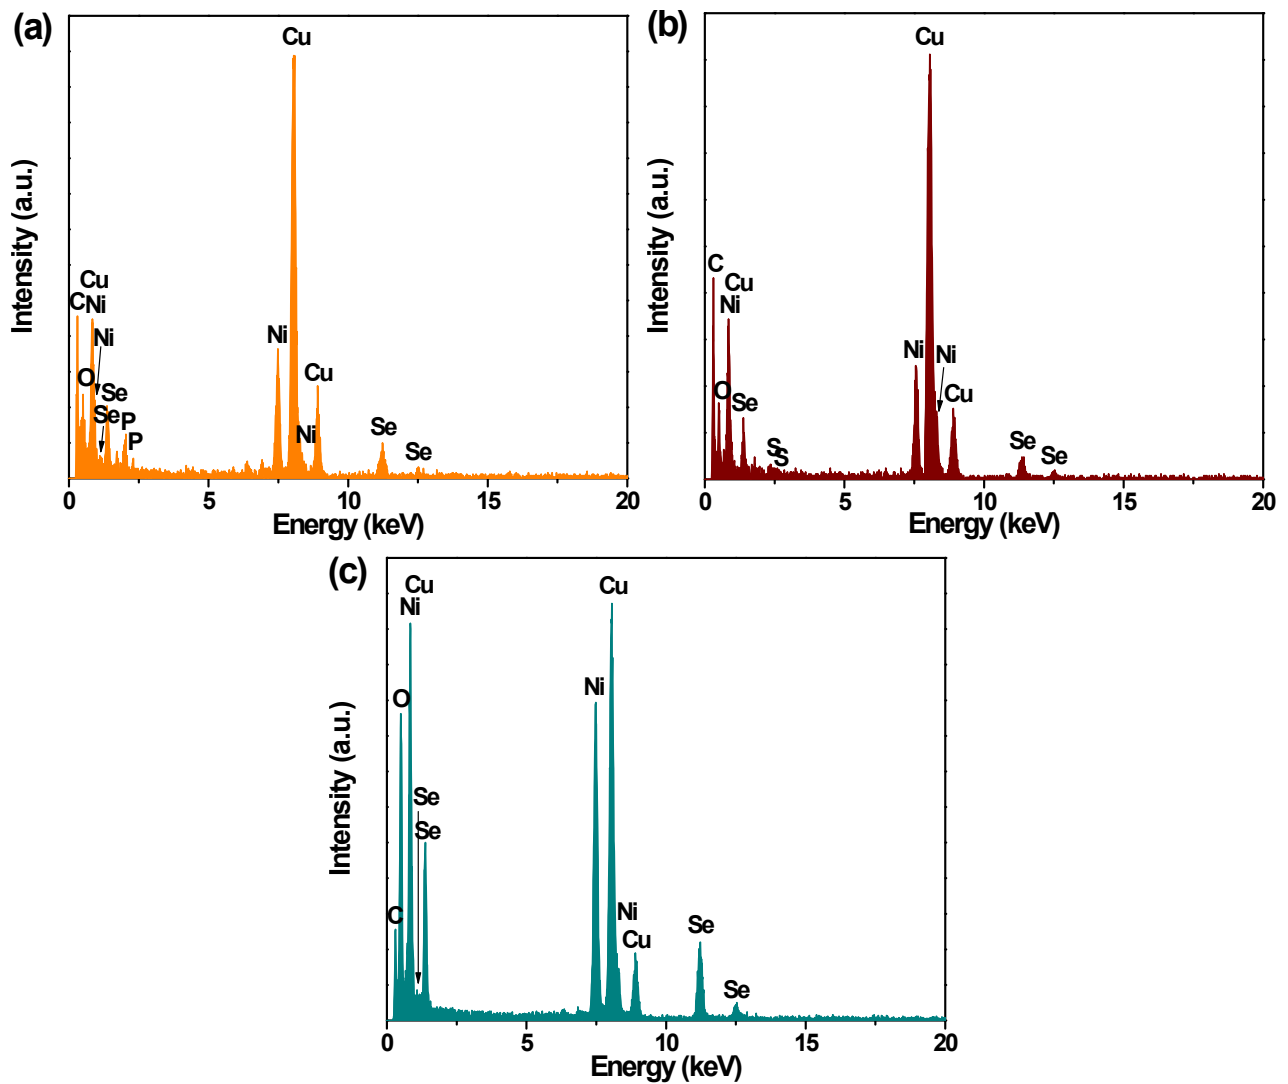

**Figure S3.** STEM-EDX spectra of the as-prepared (a)  $\text{Ni}_2\text{P}/\text{Ni}_3\text{Se}_4$ -5.0, (b)  $\text{Ni}_3\text{S}_4/\text{Ni}_3\text{Se}_4$ -5.0, and (c)  $\text{NiSe}_2/\text{Ni}_3\text{Se}_4$ -5.0. The Cu, C, and O signals stem from the copper grid used for TEM imaging, carbon supporting film, and oxidized surface species of the samples, respectively.

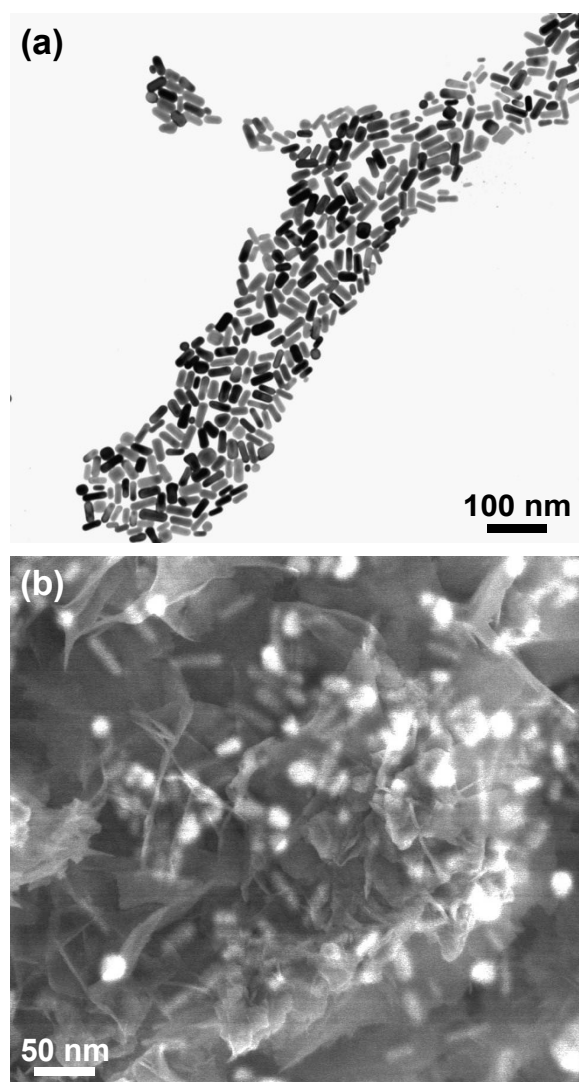

**Figure S4.** (a) TEM and (b) SEM images of the as-prepared (a)  $\text{Ni}_3\text{S}_4$  NRs and (b)  $\text{Ni}_3\text{S}_4/\text{Ni}_3\text{Se}_4$ -5.0.

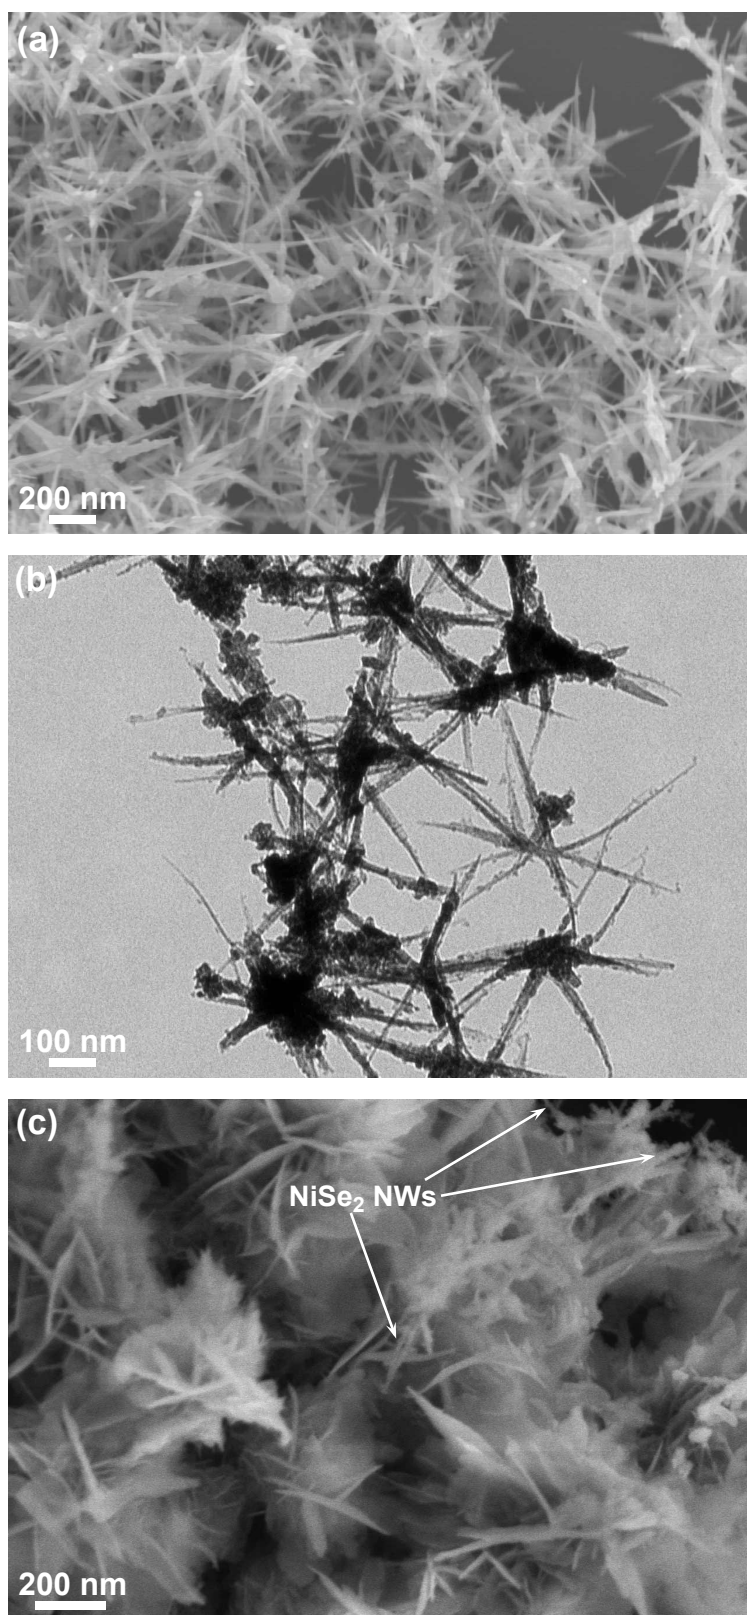

**Figure S5.** (a and c) SEM and (b) TEM images of the as-prepared (a and b) NiSe<sub>2</sub> NWs and (c) NiSe<sub>2</sub>/Ni<sub>3</sub>Se<sub>4</sub>-5.0.

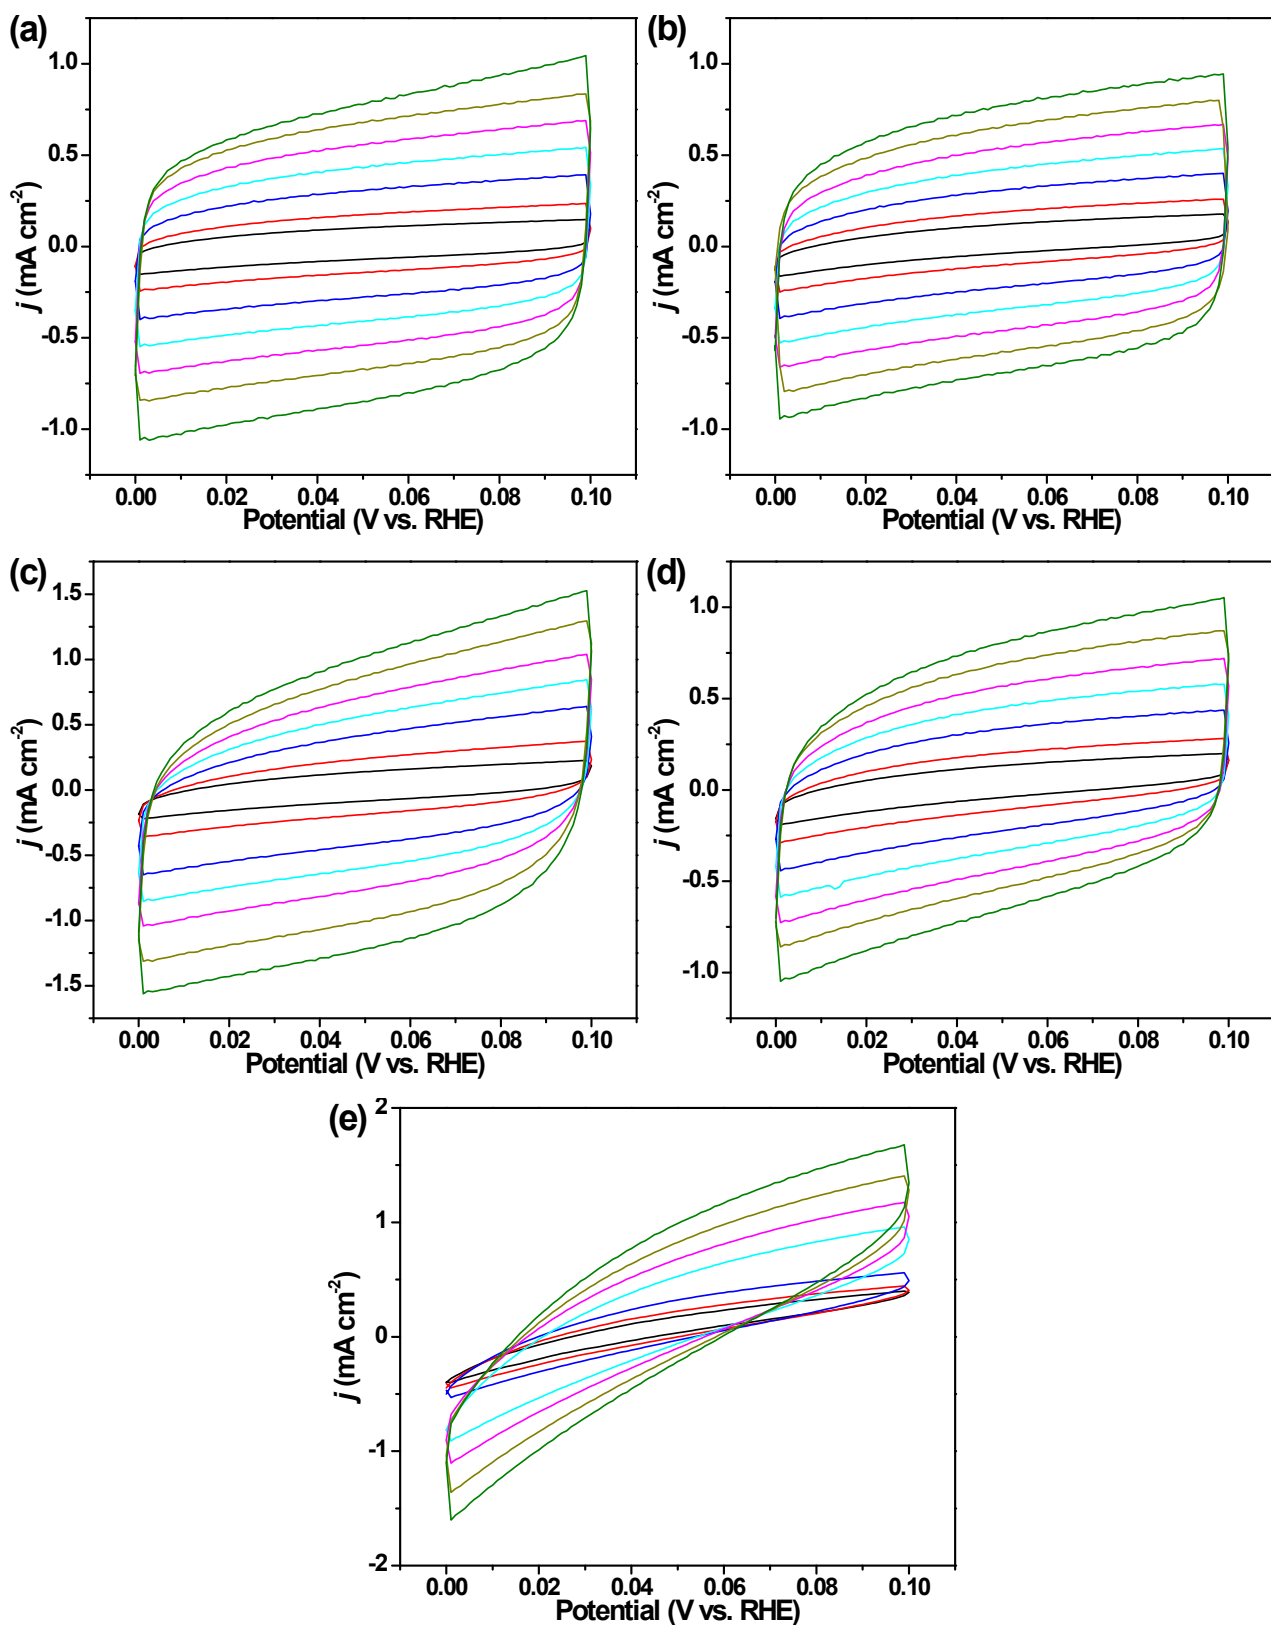

**Figure S6.** CV curves of (a)  $\text{Ni}_2\text{P}/\text{Ni}_3\text{Se}_4\text{-}2.5$ , (b)  $\text{Ni}_2\text{P}/\text{Ni}_3\text{Se}_4\text{-}5.0$ , (c)  $\text{Ni}_2\text{P}/\text{Ni}_3\text{Se}_4\text{-}7.5$ , (d)  $\text{Ni}_3\text{Se}_4$  NSs/NF, and (e)  $\text{Ni}_2\text{P}$  NPs/NF electrodes recorded in 1 M KOH aqueous solution. Scan rates of 5, 10, 20, 30, 40, 50, and 60  $\text{mV s}^{-1}$  were chosen.



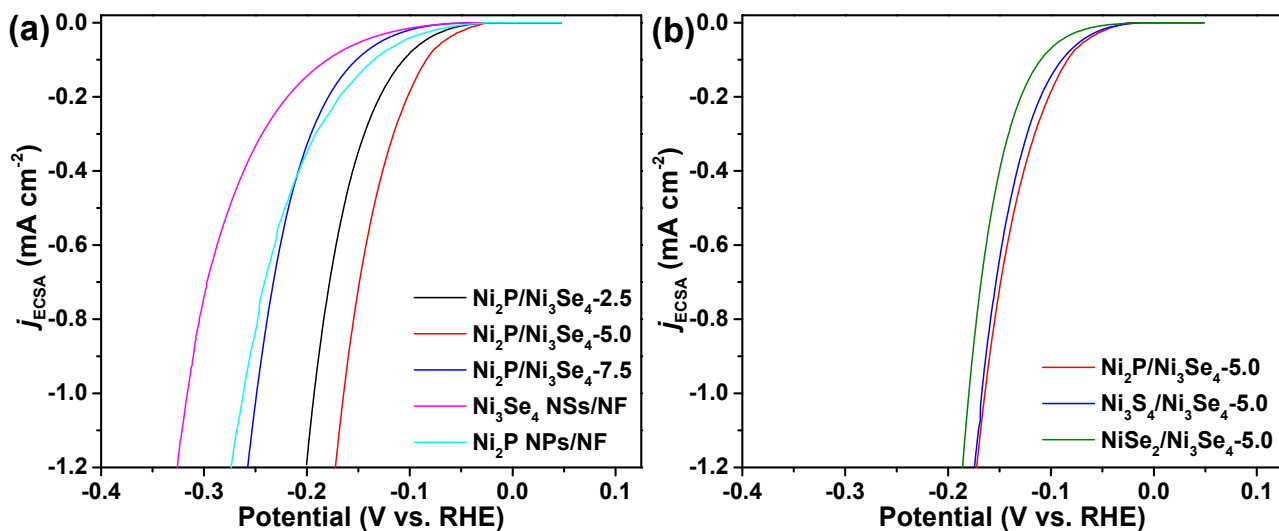

**Figure S7.** (a and b) Normalized polarization curves of various electrocatalysts measured in 1 M KOH, where the  $j$  of each electrocatalyst is normalized to the ECSA of the corresponding electrocatalyst. A specific capacitance of  $0.040 \text{ mF cm}^{-2}$  is adopted in 1 M KOH.

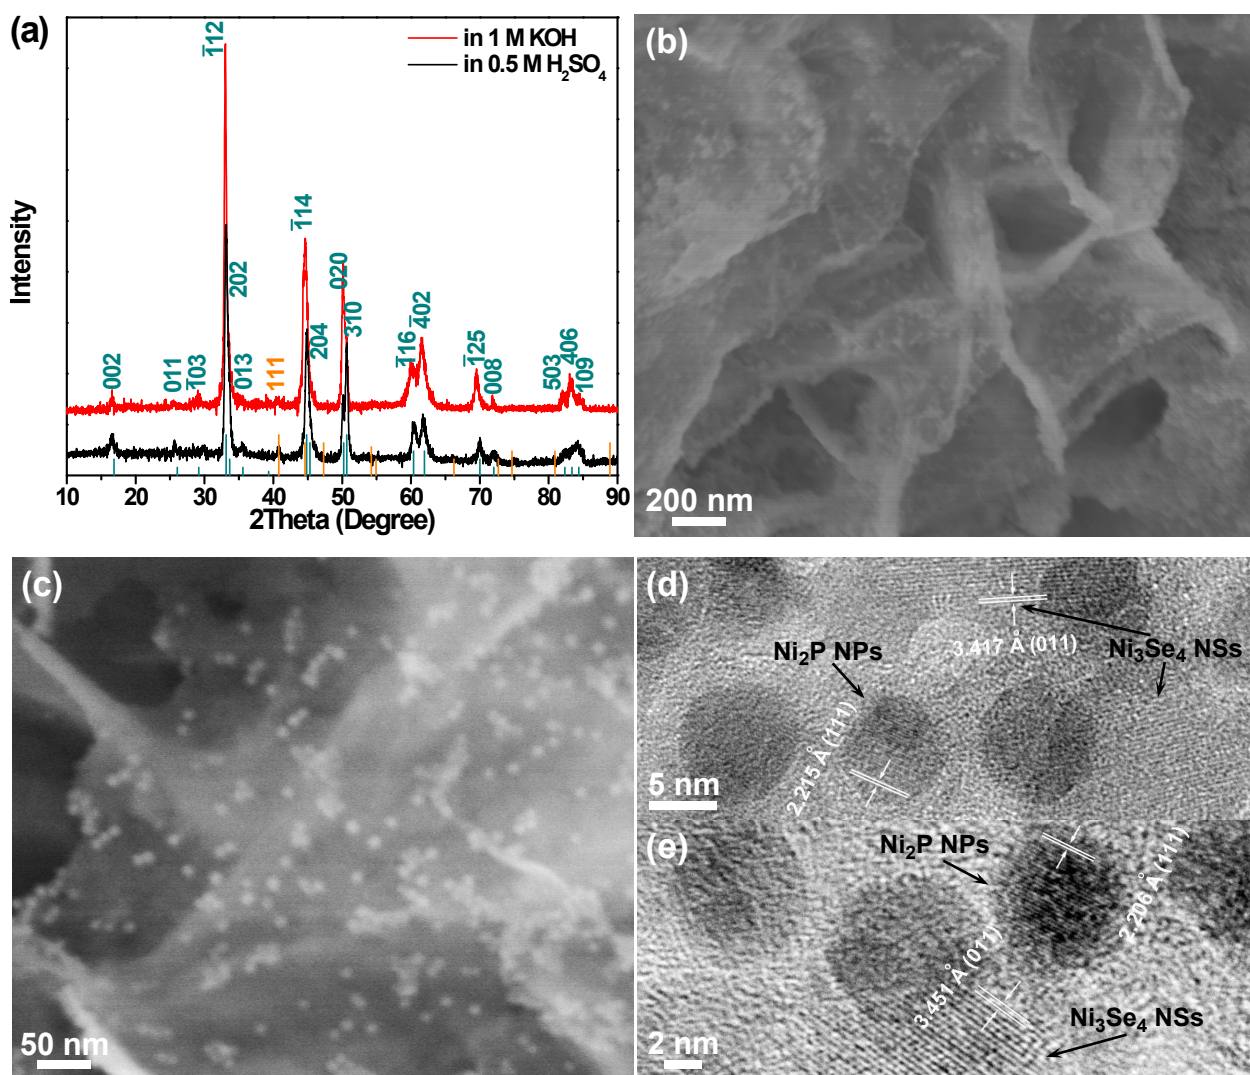

**Figure S8.** (a) XRD patterns, (b and c) SEM, and (d and e) HRTEM images of the  $\text{Ni}_2\text{P}/\text{Ni}_3\text{Se}_4\text{-5.0}$  obtained after

CP measurement at a  $j$  of  $20 \text{ mA cm}^{-2}$  for the HER over a period of 50 h in (b and d) 1 M KOH and (c and e) 0.5 M  $\text{H}_2\text{SO}_4$ .

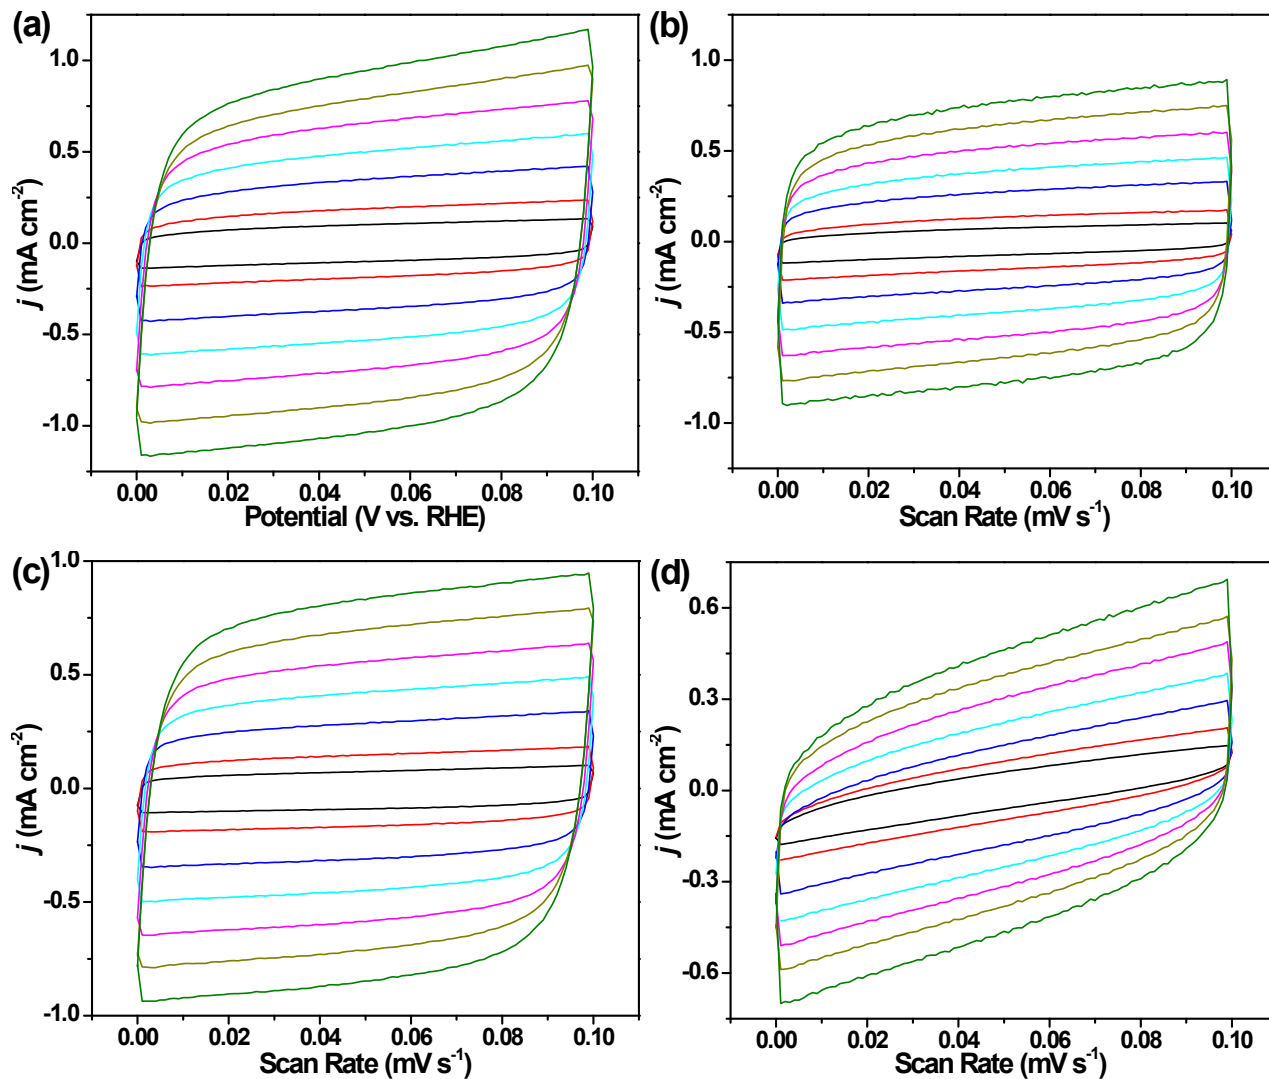

**Figure S9.** CV curves of (a)  $\text{Ni}_3\text{S}_4/\text{Ni}_3\text{Se}_4$ -5.0, (b)  $\text{Ni}_3\text{S}_4$  NRs/NF, (c)  $\text{NiSe}_2/\text{Ni}_3\text{Se}_4$ -5.0, and (d)  $\text{NiSe}_2$  NWs/NF electrodes obtained in 1 M KOH aqueous solution. Scan rates of 5, 10, 20, 30, 40, 50, and  $60 \text{ mV s}^{-1}$  were chosen.

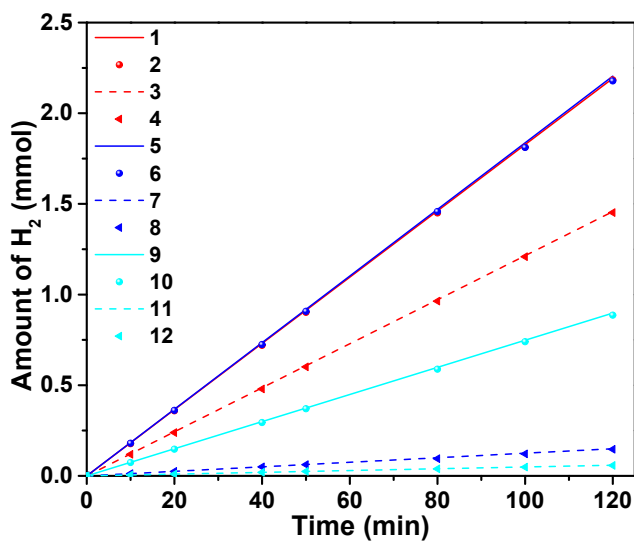

**Figure S10.** The time evolution of the measured amount of the produced  $\text{H}_2$  (plots 2, 4, 6, 8, 10, and 12) with respect to the theoretically calculated values assuming a 100% Faradaic efficiency for the HER (plots 1, 3, 5, 7, 9,



and 11). Plots 1–4, 5–8, and 9–12 are recorded from the  $\text{Ni}_2\text{P}/\text{Ni}_3\text{Se}_4$ -5.0,  $\text{Ni}_3\text{S}_4/\text{Ni}_3\text{Se}_4$ -5.0, and  $\text{NiSe}_2/\text{Ni}_3\text{Se}_4$ -5.0, respectively, in 1 M KOH (plots 1, 2, 5, 6, 9, and 10) or 0.5 M  $\text{H}_2\text{SO}_4$  (plots 3, 4, 7, 8, 11, and 12). All the values are obtained at an  $\eta$  of 0.1 V.

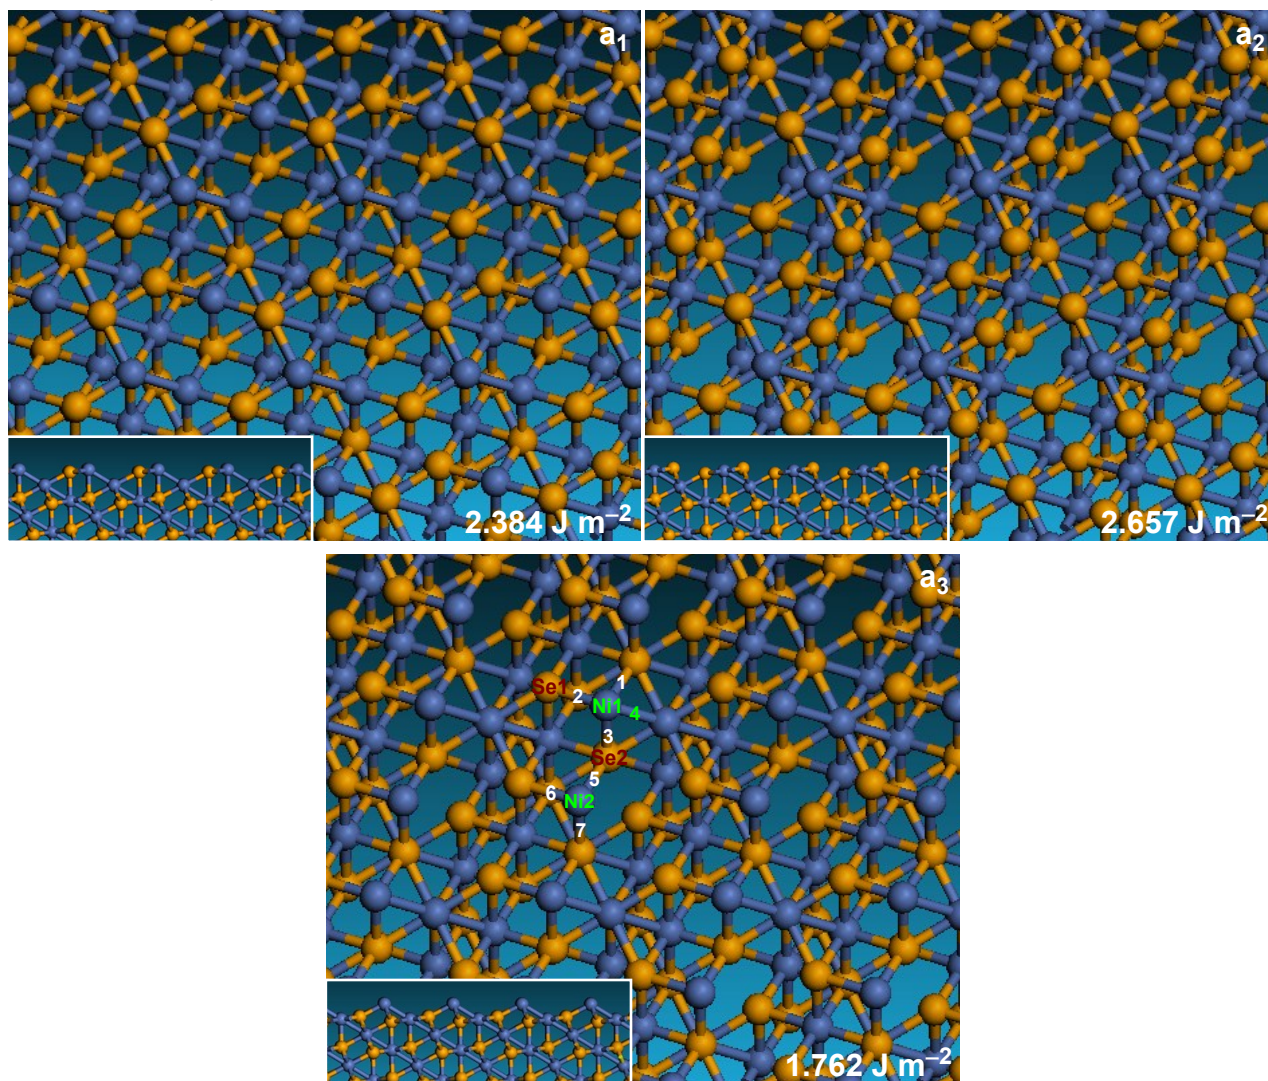

**Figure S11.** Top and side view (insets) models of possible exposed terminations for the  $(-112)$  surface structure of  $\text{Ni}_3\text{Se}_4$ , showing three types of  $(-112)$  facets with different terminations. The blue and yellow balls represent Ni and Se atoms, respectively. The surface energy is computed to be  $2.384$ ,  $2.657$ , and  $1.762 \text{ J m}^{-2}$  for  $a_1$ ,  $a_2$ , and  $a_3$ , respectively.



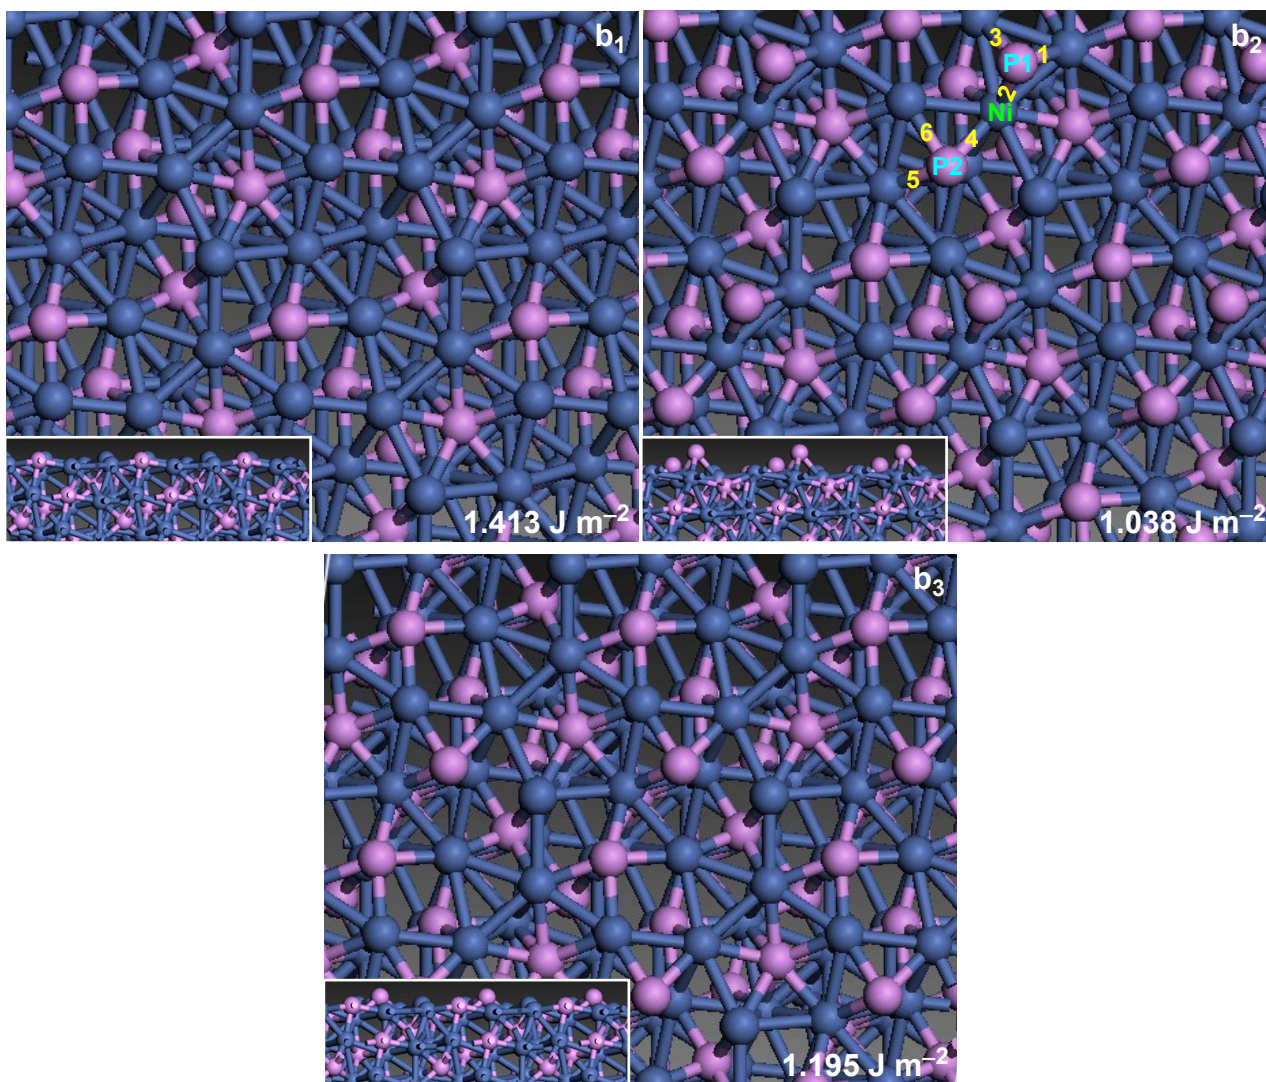

**Figure S12.** Top and side view (insets) models of possible exposed terminations for the (111) surface structure of  $\text{Ni}_2\text{P}$ , showing three types of (111) facets with different terminations. The blue and pink balls represent Ni and P atoms, respectively. The surface energy is computed to be 1.413, 1.038, and 1.195  $\text{J m}^{-2}$  for  $b_1$ ,  $b_2$ , and  $b_3$ , respectively.

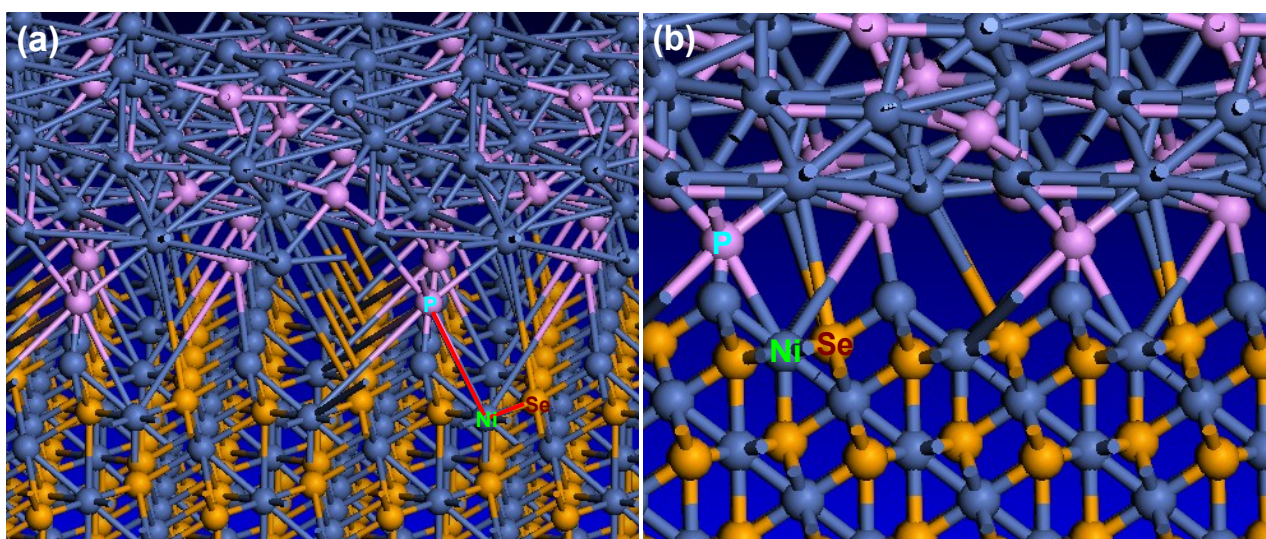

**Figure S13.** (a) Oblique and (b) side view models of the interface structure of  $\text{Ni}_2\text{P}(111)/\text{Ni}_3\text{Se}_4(-112)$ . The

labeled Se and P atoms are the most likely active sites for the HER due to the interfacial P–Ni–Se bond (marked by the red lines).

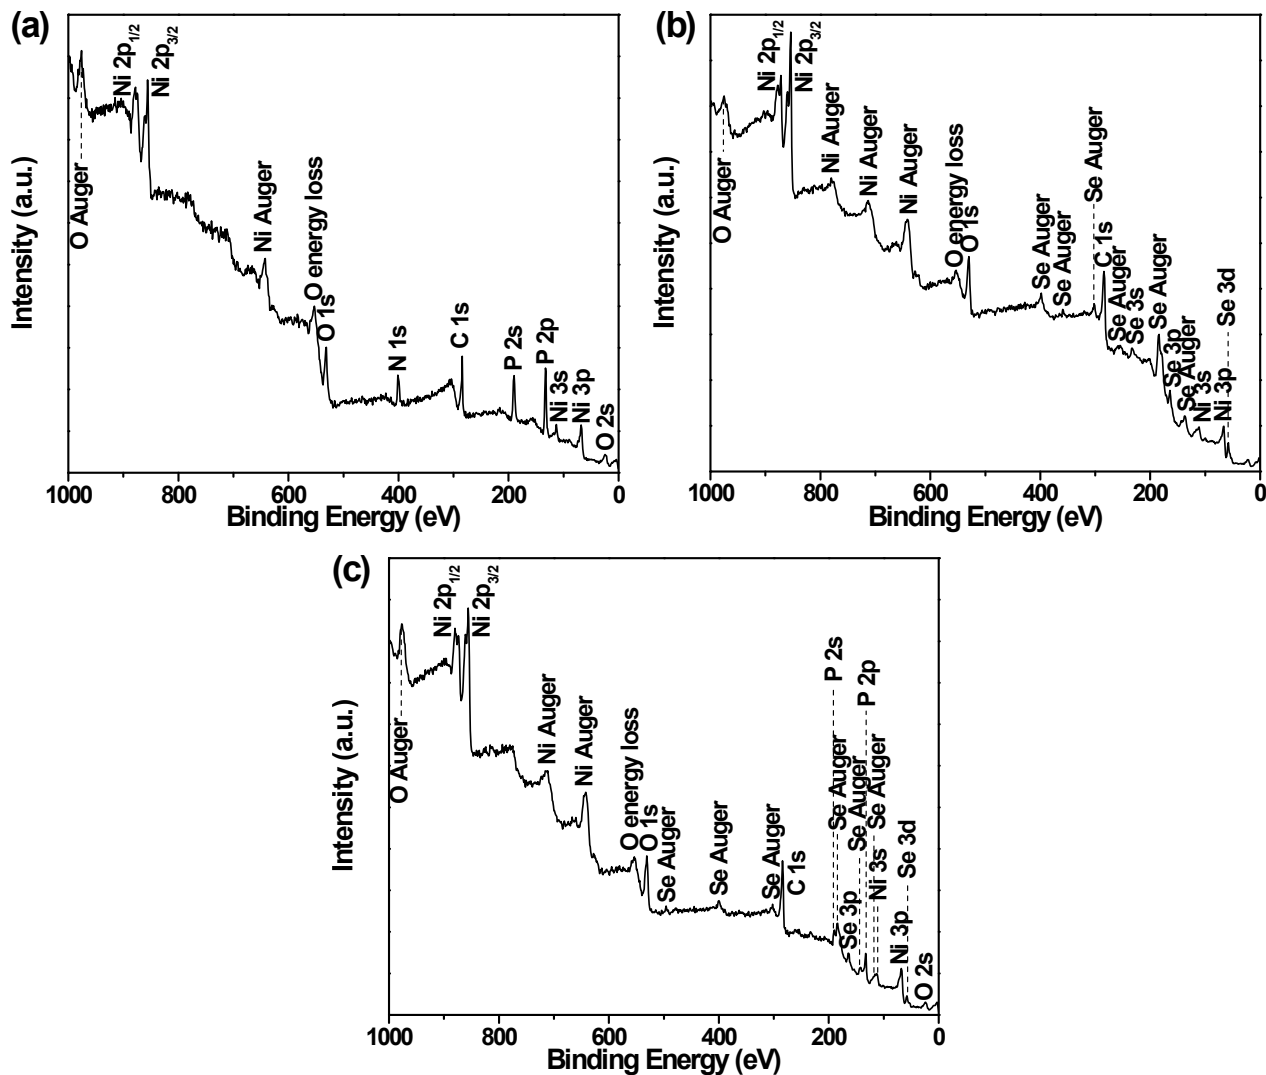

**Figure S14.** XPS survey spectra collected from (a) the Ni<sub>2</sub>P NPs, (b) Ni<sub>3</sub>Se<sub>4</sub> NSs, and (c) Ni<sub>2</sub>P/Ni<sub>3</sub>Se<sub>4</sub>-5.0. The O peaks are attributed to the inevitable surface oxides.

**Table S1.** Comparison of the electrocatalytic activity of the previously reported Ni<sub>2</sub>P and Ni<sub>3</sub>Se<sub>4</sub> catalysts in the literature with X/Ni<sub>3</sub>Se<sub>4</sub>-5.0 in this work for the HER

| catalyst/electrode                                | $\eta$ (mV) at<br>$j$ (mA cm <sup>-2</sup> ) | Tafel slope<br>(mV dec <sup>-1</sup> ) | loading<br>(mg cm <sup>-2</sup> ) | electrolyte                                   | Ref          |
|---------------------------------------------------|----------------------------------------------|----------------------------------------|-----------------------------------|-----------------------------------------------|--------------|
| Ni <sub>2</sub> P NPs/Ti                          | -180 at -100                                 | -81                                    | ~1                                | 0.5 M H <sub>2</sub> SO <sub>4</sub>          | 29           |
| Ni <sub>2</sub> P NPs/GCE                         | -250 at -20<br>-140 at -20                   | -100<br>-87                            | 0.38                              | 1 M KOH<br>1 M H <sub>2</sub> SO <sub>4</sub> | 30           |
| Ni <sub>2</sub> P NPs/GCE                         | -137 at -10                                  | -49                                    | 1.99                              | 0.5 M H <sub>2</sub> SO <sub>4</sub>          | 31           |
| Ni <sub>2</sub> P/NF                              | ca. -150 at -10                              | -93                                    | not mentioned                     | 1 M KOH                                       | 34           |
| Ni <sub>2</sub> P hollow microspheres/GCE         | -98 at -10                                   | -86.4                                  | 0.283                             | 1 M KOH                                       | 35           |
| Ni <sub>3</sub> Se <sub>4</sub> nanoassemblies/Ni | -208 at -50                                  | -156                                   | 2.4                               | 1 M KOH                                       | 36           |
| Ni <sub>2</sub> P/NF                              | -99 at -10                                   |                                        |                                   |                                               | in this work |
|                                                   | -126 at -20                                  | -96                                    | 5                                 | 1 M KOH                                       |              |
|                                                   | -208 at -100                                 |                                        |                                   |                                               |              |
|                                                   | -100 at -10                                  |                                        |                                   |                                               |              |
|                                                   | -126 at -20                                  | -93                                    | 5                                 | 0.5 M H <sub>2</sub> SO <sub>4</sub>          |              |
| Ni <sub>3</sub> Se <sub>4</sub> NSs/NF            | -205 at -100                                 |                                        |                                   |                                               | in this work |
|                                                   | -206 at -50                                  | -113                                   | 1.6                               | 1 M KOH                                       |              |
|                                                   | -209 at -50                                  | -96                                    | 1.6                               | 0.5 M H <sub>2</sub> SO <sub>4</sub>          |              |

**Table S2.** Comparison of the electrocatalytic activity of various hybrid h-NMs catalysts in the literature with the X/Ni<sub>3</sub>Se<sub>4</sub>-5.0 in this work for the HER

| catalyst/electrode                                                                   | $\eta$ (mV) at $j$ (mA cm <sup>-2</sup> )                | Tafel slope (mV dec <sup>-1</sup> ) | loading (mg cm <sup>-2</sup> )                                                | electrolyte                                     | Ref in the text |
|--------------------------------------------------------------------------------------|----------------------------------------------------------|-------------------------------------|-------------------------------------------------------------------------------|-------------------------------------------------|-----------------|
| Ni/NiO/CoSe <sub>2</sub> /GCE                                                        | ca. -80 at -10<br>< -200 at -100                         | -39                                 | 0.28                                                                          | 0.5 M H <sub>2</sub> SO <sub>4</sub>            | 6               |
| MoS <sub>2</sub> /CoSe <sub>2</sub> /GCE                                             | -68 at -10                                               | -36                                 | 0.28                                                                          | 0.5 M H <sub>2</sub> SO <sub>4</sub>            | 7               |
| Co <sub>9</sub> S <sub>8</sub> @MoS <sub>2</sub> /CNFs                               | -190 at -10                                              | -110                                | 0.212                                                                         | 0.5 M H <sub>2</sub> SO <sub>4</sub>            | 8               |
| EG/Co <sub>0.85</sub> Se/NiFe-LDH                                                    | -260 at -10                                              | -160                                | 4                                                                             | 1 M KOH                                         | 9               |
| NiFe/NiCo <sub>2</sub> O <sub>4</sub> /NF                                            | -105 at -10                                              | -88                                 | 0.15                                                                          | 1 M KOH                                         | 10              |
| MoO <sub>x</sub> /Ni <sub>3</sub> S <sub>2</sub> /NF                                 | -106 at -10<br>-224 at -100                              | -90                                 | > 12                                                                          | 1 M KOH                                         | 11              |
| MoS <sub>2</sub> /Ni <sub>3</sub> S <sub>2</sub> /NF                                 | -110 at -10                                              | -83                                 | 9.7                                                                           | 1 M KOH                                         | 12              |
| MoS <sub>2</sub> -Ni <sub>3</sub> S <sub>2</sub> HNRs/NF                             | -98 at -10<br>-191 at -100                               | -61                                 | 13                                                                            | 1 M KOH                                         | 13              |
| Ni <sub>x</sub> Co <sub>3-x</sub> S <sub>4</sub> /Ni <sub>3</sub> S <sub>2</sub> /NF | -136 at -10<br>-258 at -100                              | -107                                | 0.56                                                                          | 1 M KOH                                         | 14              |
| EG/Ni <sub>3</sub> Se <sub>2</sub> /Co <sub>9</sub> S <sub>8</sub> /graphite         | ca. -150 at -10<br>-230 at -50                           | -83                                 | 2.5                                                                           | 1 M KOH                                         | 15              |
| MoS <sub>2</sub> /NiCo-LDH/NF                                                        | -78 at -10<br>-170 at -100                               | -77                                 | 3.5-4.0                                                                       | 1 M KOH                                         | 16              |
| CoS <sub>2</sub> @WS <sub>2</sub> /CC                                                | -97 at -10                                               | -66                                 | CoS <sub>2</sub> : 2.0<br>WS <sub>2</sub> : 1.0                               | 0.5 M H <sub>2</sub> SO <sub>4</sub>            | 17              |
| Co <sub>9</sub> S <sub>8</sub> /WS <sub>2</sub> nanobelt/Ti                          | -138 at -10                                              | -80                                 | 2.2                                                                           | 1 M KOH                                         | 18              |
| Co <sub>3</sub> S <sub>4</sub> @MoS <sub>2</sub> /GCE                                | -210 at -10                                              | -88                                 | 0.283                                                                         | 0.5 M H <sub>2</sub> SO <sub>4</sub>            | 19              |
| TiO <sub>2</sub> NDs/Co NSNTs-CFs                                                    | -108 at -10<br>-235 at -100                              | -62                                 | 0.75                                                                          | 1 M KOH                                         | 20              |
| Cu NDs/Ni <sub>3</sub> S <sub>2</sub> NTs-CFs                                        | -128 at -10                                              | -76.2                               | 0.52                                                                          | 1 M KOH                                         | 21              |
| MoS <sub>2</sub> /NiCo <sub>2</sub> S <sub>4</sub> /CFP                              | -140 at -10<br>-173 at -100                              | -38                                 | not mentioned                                                                 | 0.5 M H <sub>2</sub> SO <sub>4</sub>            | 22              |
| CeO <sub>2</sub> -Cu <sub>3</sub> P/NF                                               | -91 at -15                                               | -132                                | not mentioned                                                                 | 1 M KOH                                         | 23              |
| MoS <sub>2</sub> /Co <sub>3</sub> S <sub>4</sub> /GCE                                | -175 at -10<br>-220 at -100                              | -56<br>-115                         | 0.285                                                                         | 0.5 M H <sub>2</sub> SO <sub>4</sub><br>1 M KOH | 24              |
| CoP <sub>3</sub> /Ni <sub>2</sub> P/GCE                                              | -115 at -10                                              | -49                                 | 0.31                                                                          | 0.5 M H <sub>2</sub> SO <sub>4</sub>            | 25              |
| MoS <sub>2</sub> /NiS NCs/NF                                                         | -92 at -10                                               | -113                                | 4.9                                                                           | 1 M KOH                                         | 26              |
| FeS <sub>2</sub> /CoS <sub>2</sub> NSs/NF                                            | -78 at -10                                               | -44                                 | 0.2                                                                           | 1 M KOH                                         | 27              |
| Co <sub>3</sub> S <sub>4</sub> /MoS <sub>2</sub> /Ni <sub>2</sub> P/GCE              | -178 at -10                                              | -98                                 | 0.144                                                                         | 1 M KOH                                         | 28              |
| NiS-MoS <sub>2</sub> HNSAs/CC                                                        | -106 at -10                                              | -57                                 | 2.8                                                                           | 1 M KOH                                         | 29              |
| MoS <sub>2</sub> /NiS <sub>2</sub> nanosheets/CC                                     | -62 at -10<br>-131 at -100                               | -50                                 | 1.1                                                                           | 1 M KOH                                         | 30              |
| Co <sub>9</sub> S <sub>8</sub> -MoS <sub>2</sub> @3DC                                | -177 at -10<br>-230 at -10                               | -84<br>-112                         | 1.0                                                                           | 1 M KOH<br>0.5 M H <sub>2</sub> SO <sub>4</sub> | 31              |
| CoSe <sub>2</sub> @MoSe <sub>2</sub> /GCE                                            | -183 at -10                                              | -43                                 | 0.53                                                                          | 0.5 M H <sub>2</sub> SO <sub>4</sub>            | 32              |
| CoSe <sub>2</sub> @MoSe <sub>2</sub> /NF                                             | -183 at -10                                              | -88                                 | 0.60                                                                          | 1 M KOH                                         |                 |
| Ni <sub>2</sub> P-NiP <sub>2</sub> HNPs/NF                                           | -60 at -10                                               | -59                                 | 5                                                                             | 1 M KOH                                         | 33              |
| NiSe-Ni <sub>0.85</sub> Se/CP                                                        | -101 at -10                                              | -74                                 | 1.68                                                                          | 1 M KOH                                         | 34              |
| TiO <sub>2</sub> @ Ni <sub>3</sub> S <sub>2</sub>                                    | -112 at -10<br>-170 at -100                              | -69                                 | not mentioned                                                                 | 1 M KOH                                         | 35              |
| NiFe LDH@Ni <sub>3</sub> S <sub>2</sub> /NF                                          | -184 at -10                                              | -115                                | not mentioned                                                                 | 1 M KOH                                         | 36              |
| Ni <sub>2</sub> P/Ni/NF                                                              | -98 at -10                                               | -72                                 | not mentioned                                                                 | 1 M KOH                                         | 46              |
| NF@Ni <sub>2</sub> P/C                                                               | ca. -85 at -10                                           | -57                                 | not mentioned                                                                 | 1 M KOH                                         | 49              |
| NF@Fe <sub>2</sub> -Ni <sub>2</sub> P/C                                              | -39 at -10                                               | -30                                 | 3.9 ± 0.3                                                                     | 1 M KOH                                         |                 |
| Ni <sub>2</sub> P/Ni <sub>3</sub> Se <sub>4</sub> -5.0/NF                            | -57 at -10<br>-118 at -100<br>-76 at -10<br>-122 at -100 | -54<br>-40                          | Ni <sub>2</sub> P: 5.0<br>Ni <sub>3</sub> Se <sub>4</sub> : 1.6               | 1 M KOH<br>0.5 M H <sub>2</sub> SO <sub>4</sub> | in this work    |
| Ni <sub>3</sub> S <sub>4</sub> /Ni <sub>3</sub> Se <sub>4</sub> -5.0/NF              | -55 at -10<br>-116 at -100                               | -46                                 | Ni <sub>3</sub> S <sub>4</sub> : 5.0<br>Ni <sub>3</sub> Se <sub>4</sub> : 1.6 | 1 M KOH                                         | in this work    |



|                                                            |                                                           |            |                                                                  |                                                 |              |
|------------------------------------------------------------|-----------------------------------------------------------|------------|------------------------------------------------------------------|-------------------------------------------------|--------------|
|                                                            | -113 at -10<br>-156 at -100                               | -36        |                                                                  | 0.5 M H <sub>2</sub> SO <sub>4</sub>            |              |
| NiSe <sub>2</sub> /Ni <sub>3</sub> Se <sub>4</sub> -5.0/NF | -78 at -10<br>-140 at -100<br>-132 at -10<br>-176 at -100 | -56<br>-42 | NiSe <sub>2</sub> : 5.0<br>Ni <sub>3</sub> Se <sub>4</sub> : 1.6 | 1 M KOH<br>0.5 M H <sub>2</sub> SO <sub>4</sub> | in this work |

**Table S3.** Lattice parameters (Å) of supercells for various model catalysts

| catalyst                                                      | <i>a</i> | <i>b</i> | <i>c</i> |
|---------------------------------------------------------------|----------|----------|----------|
| Ni <sub>3</sub> Se <sub>4</sub>                               | 6.351    | 7.202    | 21.970   |
| Ni <sub>2</sub> P                                             | 6.760    | 6.760    | 21.589   |
| Ni <sub>2</sub> P(111)/Ni <sub>3</sub> Se <sub>4</sub> (-112) | 6.555    | 6.981    | 21.891   |

**Table S4.** Comparison of the DFT computations for the H\* at different surface adsorption sites on the (-112) surface (a<sub>3</sub>) of Ni<sub>3</sub>Se<sub>4</sub> and (111) surface (b<sub>2</sub>) of Ni<sub>2</sub>P.

| adsorption site on a <sub>3</sub> | $\Delta E_{H^*}$ (eV) | $\Delta ZPE$ (eV) | $\Delta G_{H^*}$ (eV) | adsorption site on b <sub>2</sub> | $\Delta E_{H^*}$ (eV) | $\Delta ZPE$ (eV) | $\Delta G_{H^*}$ (eV) |
|-----------------------------------|-----------------------|-------------------|-----------------------|-----------------------------------|-----------------------|-------------------|-----------------------|
| Ni1                               | -0.908                | 0.027             | -0.681                | P1                                | 0.019                 | 0.028             | 0.247                 |
| 1                                 | -0.862                | 0.035             | -0.627                | 1                                 | 0.196                 | 0.034             | 0.430                 |
| 2                                 | -0.771                | 0.035             | -0.536                | 3                                 | 0.190                 | 0.033             | 0.423                 |
| 4                                 | -0.830                | -0.074            | -0.704                | P2                                | 0.026                 | 0.030             | 0.256                 |
| Se1                               | -0.667                | 0.031             | -0.436                | 4                                 | 0.188                 | 0.031             | 0.419                 |
| Ni2                               | -1.035                | 0.027             | -0.808                | 6                                 | 0.178                 | 0.033             | 0.411                 |
| 5                                 | -0.921                | 0.032             | -0.689                | Ni                                | -0.797                | 0.032             | -0.565                |
| 7                                 | -0.928                | 0.033             | -0.695                |                                   |                       |                   |                       |
| Se2                               | -0.626                | 0.032             | -0.394                |                                   |                       |                   |                       |
